# Supplementary material for: Coverage for pertussis vaccination during pregnancy with 4 models of vaccine delivery: a quasiexperimental, multicentre observational study
Source: PubMed Central journal article supplement — CMAJ Open. 2022 Feb 1;10(1):E56–63. doi: 10.9778/cmajo.20210011 (PMC8812719; doi:10.9778/cmajo.20210011), 2022-02-01
Supplement: open-2021-0011-original-submission.pdf [file open-2021-0011-original-submission.pdf]

**Title:** Pertussis vaccination during pregnancy: vaccine coverage associated with four different models of vaccine delivery in a quasi-experimental multicenter observational study

**Authors:** Yinan Li (BSc, MScPH candidate)<sup>1,2</sup>, Nicholas Brousseau (MD, MSc)<sup>3,4</sup>, Maryse Guay (MD, MSc)<sup>5,6</sup>, Ève Dubé (PhD)<sup>3,4</sup>, Zineb Laghdir (MSc)<sup>2</sup>, Isabelle Boucoiran (MD, MSc)<sup>2,7</sup>, Bruce Tapiéro (MD)<sup>2,8</sup>, Caroline Quach (MD, MSc)<sup>9,10</sup>

**Institutional affiliations:**

<sup>1</sup> Department of Epidemiology, Biostatistics & Occupational Health, McGill University, Montreal, Quebec, Canada

<sup>2</sup> CHU Sainte-Justine Research Center, Montreal, Quebec, Canada

<sup>3</sup> Direction des risques biologiques et de la santé au travail, Institut national de la santé publique du Québec, Quebec City, Quebec, Canada

<sup>4</sup> CHU de Quebec Research Center, Université Laval, Quebec City, Quebec, Canada

<sup>5</sup> Research Center, Hôpital Charles-Lemoyne, Longueuil, Quebec, Canada

<sup>6</sup> Département des sciences de la santé communautaire, Université de Sherbrooke, Sherbrooke, Quebec, Canada

<sup>7</sup> Department of Obstetrics & Gynecology, School of Public Health, Université de Montréal, Montreal, Quebec, Canada

<sup>8</sup> Infectious Diseases Division, Department of Pediatrics, CHU Sainte-Justine, Montreal, Quebec, Canada

<sup>9</sup> Department of Microbiology, Infectious Diseases and Immunology, Université de Montréal, Montreal, Quebec, Canada

<sup>10</sup> Infection Prevention and Control, Clinical Department of Laboratory Medicine, CHU Sainte-Justine, Montreal, Quebec, Canada

**Corresponding Author**

Caroline Quach

B.17.102 – 3175, chemin de la Côte Ste-Catherine, Montreal, Quebec, Canada, H3T 1C5

Tel: (514)-345-4931, ext. 7430

Email: c.quach@umontreal.ca

**Funding statement**

This work was funded by Quebec Ministry of Health and Social Services (Ministère de la Santé et des Services sociaux).

**Data sharing statement**

Data presented in this manuscript are available upon request after project completion to other investigators who are not on public servers.

**Declaration of author(s) competing interests**

Bruce Tapiéro received research grants from Merck, GSK, Pfizer, and Sanofi. All other authors have no competing interests to declare.

**Acknowledgements**

The authors thank Maryline Vivion, Marie-Claude Gariépy, Josiane Rivard and all people who contributed to data collection. They also thank all the study participants and regional collaborators who made this project possible.

**Keywords**

Immunization, Infectious diseases, Obstetrics and gynecology, Pertussis, Pregnancy, Public Health, Vaccine coverage, Vaccine delivery, Whooping cough

**Word count:** 2468 words

## Abstract

### Background:

Vaccination of all pregnant women with an acellular pertussis-containing vaccine (Tdap) is recommended in Canada since 2018. The evaluation of delivery models for efficient maternal Tdap administration was considered a priority. We aimed to compare the vaccine coverage (VC) for four delivery models in Quebec.

### Methods:

In this quasi-experimental multicenter observational study, 1000 women <21 weeks of pregnancy were recruited in four Quebec regions. Four vaccine delivery models were compared: 1) Local Community Service Centres (CLSCs, baseline), 2) family medicine group (FMG), 3) obstetrics clinic, and 4) the oral glucose challenge test (OGCT). Vaccination status was determined from a self-reported questionnaire, the Quebec Immunization Registry, and/or medical charts. Model-specific and global VC was compared between models and logistic regression was used to adjust for socio-demographic variables.

### Results:

Overall, 946 women were eligible for analyses. Vaccination at the FMG achieved highest model-specific VC (67.8%; 95%CI, 60.5%-74.4%), not significantly different from the CLSC model (63.8%; 95%CI, 57.6%-69.6%). For global VC, the FMG (86.5%; 95%CI, 80.6%-90.9%) and obstetrics models (85.9%; 95%CI, 80.9%-89.7%) achieved significantly higher VC than the CLSC model (66.3%; 95%CI, 60.1%-71.9%). The OGCT model did not improve global VC (61.8%; 95%CI, 56.1%-67.2%).

### Interpretation:

Compared with CLSCs, global VC was improved when Tdap was offered in the FMG or obstetrics clinic providing prenatal care. Recommendation of vaccination from health professionals involved in pregnancy follow-up and offering the vaccine may be a key factor in optimizing VC. Additional analyses focused on vaccine acceptability and costs for model implementation are underway.

## Introduction

Pertussis infection and complications can be severe in young infants.[1,2] From 2006 to 2015 in Canada, infants less than one year of age had the highest hospitalization rates (33.6 cases per 100,000 population).[1] Infants <two months of age, who have not started their primary vaccination against pertussis, accounted for nearly half of special care unit admissions (40.5%).[1] Administration of the tetanus-diphtheria-acellular pertussis (Tdap) vaccine during pregnancy increases trans-placental transfer of maternal antibodies and provides direct protection of the infants.[1,3,4,5] In 2018, the National Advisory Committee on Immunization (NACI) recommended the systematic vaccination of all pregnant women against pertussis, at every pregnancy.[4] As of May 2018, the province of Quebec has recommended maternal Tdap immunization, ideally between 26 and 32 weeks of every pregnancy.[6] Many countries, including the United States [7-11], the United Kingdom [12], Belgium [13,14], New Zealand [15,16], and Switzerland [17], have recommended maternal Tdap immunization routinely in every pregnancy. Public Health England reported that, in 2019-2020, maternal Tdap vaccine coverage (VC) was ~70%.[12] Nevertheless, VC has been suboptimal in several countries [7-14,16-20], such as in the United States, where VC was ~57% in 2019-2020.[11] The modalities of Tdap vaccination implementation are major factors influencing VC.[13,18,20,21]

In Canada, there has not yet been a maternal pertussis immunization program that is integrated into existing medical care. A previous study conducted in Quebec identified challenges to successfully implement maternal Tdap vaccination.[21] Vaccination is rarely available in clinics offering prenatal care and is mainly offered in local public health clinics (Local Community Service Centres, CLSCs) by appointment. However, the study did not conclude on a specific model for efficient Tdap delivery.[21] Studies showed that Tdap VC improved when offering vaccination in traditional prenatal care settings by general practitioners or obstetrics clinics.[9,12] Gestational diabetes screening was also identified as a possible vaccination venue but has not been well studied.[21-23] As a follow-up to the previous study

1  
2  
3 [21], we aimed to assess and compare the VC associated with four province-based implementation  
4 models of maternal Tdap vaccine delivery, namely vaccination at 1) CLSCs, 2) family medicine group  
5 (FMG), 3) obstetrics clinic, and 4) the oral glucose challenge test (OGCT).  
6  
7  
8  
9

## 10 **Methods**

### 11 **Setting and participants**

12  
13  
14  
15  
16 We used a quasi-experimental multicenter study design with non-equivalent control groups of pregnant  
17 women, taking place in four health regions of Quebec (Montréal, Montérégie, Capitale-Nationale and  
18 Mauricie). From April to October 2019, women <21 weeks of pregnancy were recruited during a follow-  
19 up visit where their pregnancy was followed (Montérégie, Capitale-Nationale and Mauricie) or during  
20 their appointment for prenatal screening at the 11-13 weeks (Montréal). Eligible participants were 18  
21 years of age and over, spoke French or English, provided a valid email address, were <21 weeks of  
22 pregnancy at recruitment and delivered a live birth.  
23  
24  
25  
26  
27  
28  
29  
30  
31  
32

### 33 **Vaccine delivery models**

34  
35  
36 Four models of vaccine delivery were implemented in the four Quebec health regions where  
37 participants were recruited. Vaccine administration ran from May 2019 to March 2020.  
38  
39  
40

#### 41 *Local Community Service Centres (CLSCs) Model*

42  
43  
44 In Montérégie, participants were recruited at a FMG clinic and were referred to their CLSC for vaccine  
45 administration by a nurse. CLSCs offer community healthcare services and serve specific geographical  
46 area.[21] This model is the current standard for Tdap vaccination in Quebec and served as the baseline  
47 model.[21]  
48  
49  
50  
51  
52  
53

#### 54 *Family Medicine Group (FMG) Model*

1  
2  
3 In Montérégie and Capitale-Nationale, participants were offered Tdap vaccination at the FMG where  
4 they were followed by a team of family physicians and nurses. Three FMG served as the recruitment and  
5 vaccination sites for this model, with each one following 200 – 400 pregnancies annually.  
6  
7  
8  
9

### 10 *Obstetrics Model*

11  
12  
13 In Mauricie, participants received Tdap vaccination in a high-speed obstetrics follow-up clinic, where  
14 approximately 1200 pregnancies are followed annually. Tdap was recommended by the obstetrician and  
15 offered by a nurse at a separately scheduled appointment in the same clinic.  
16  
17  
18  
19  
20

### 21 *Oral Glucose Challenge Test (OGCT) Model*

22  
23  
24 In Montreal, participants are screened for gestational diabetes between weeks 24 – 28 of gestation  
25 through an OGCT (50 – 75g of glucose) at a hospital. Women were offered Tdap vaccination during the  
26 wait hour of the same appointment or after blood procurement. Women with preexisting diabetes were  
27 referred to CLSCs for vaccination.  
28  
29  
30  
31  
32  
33

### 34 **Variables**

35  
36  
37 Socio-demographic and contact information was collected through a paper questionnaire at  
38 recruitment. An online questionnaire on self-reported vaccination status, date and place of vaccination,  
39 was filled by participants at week 35 of pregnancy. Vaccination records from the Quebec Immunization  
40 Registry were checked to validate vaccination status. When possible, medical charts were reviewed to  
41 validate vaccination status for women who indicated unknown vaccination status or did not answer the  
42 questionnaire and for whom a proof of vaccination could not be found in the provincial registry. Medical  
43 charts were reviewed for all models, except for the CLSC model, due to logistical constraints. A pregnant  
44 woman was considered to be vaccinated when she self-reported as vaccinated in the online  
45  
46  
47  
48  
49  
50  
51  
52  
53  
54  
55  
56  
57  
58  
59  
60

1  
2  
3 questionnaire, provided a date and for whom non-vaccination was not documented in the medical  
4  
5 chart, or when there was a vaccination proof in the registry or the medical chart.  
6  
7

## 8 **Statistical analysis**

9

10  
11 The required sample size was calculated to be 250 per vaccine delivery model to detect a 15% difference  
12  
13 in VC between models (55% vs. 70%).  
14

15  
16 The primary outcome, model-specific VC, was computed as the proportion of women who received Tdap  
17  
18 vaccination within a specific vaccine delivery model out of all women eligible for each model (x100). The  
19  
20 secondary outcome, global VC, was computed as the proportion of women vaccinated with Tdap  
21  
22 (regardless of vaccination place) out of all eligible women for each model (x100).  
23

24  
25 Comparisons of VC for each model to the baseline model were performed using the Chi-Squared test  
26  
27 ( $\alpha=5\%$ , two-sided tests). Multivariable logistic regression was used to adjust for socio-demographic  
28  
29 characteristics and compute adjusted odds ratios (OR) of vaccination for each model. All analyses were  
30  
31 performed using RStudio version 1.1.463 (Boston, MA, USA).  
32  
33

34  
35 Additional sensitivity analyses and VC calculated using aggregated data collected for the OGCT model  
36  
37 are provided in the Supplementary Appendix.  
38  
39

## 40 **Ethics approval**

41

42  
43 The Centre hospitalier universitaire Sainte-Justine Research Ethics Board reviewed the study protocol  
44  
45 and approved the research project.  
46  
47

## 48 **Results**

49

### 50 **Participation rate**

51  
52  
53  
54  
55  
56  
57  
58  
59  
60

1  
2  
3 In total, 1000/1336 (75%) invited women agreed to participate (CLSC model, 251/257(98%); FMG model,  
4  
5 Overall: 187/223 (84%), FMG 1: 50/60 (83%), FMG 2: 54/77 (70%), FMG 3: 83/86 (96%); Obstetrics  
6  
7 model, 263/519 (51%); OGCT model, 299/337 (89%)). Overall, 946 women were eligible after the  
8  
9 exclusion of 54 women (14 based on age or gestational age, 16 miscarried, 3 who later refused to  
10  
11 participate, 9 with duplicate information, 11 with missing information, and 1 no longer residing in  
12  
13 Quebec).

### 14 15 16 17 **Determination of vaccination status**

18  
19  
20 We obtained questionnaire response on vaccination status for 619/946 (65.4%) participants and 503  
21  
22 (81.3%) of them self-reported as vaccinated. Using the Quebec Immunization Registry, we found a proof  
23  
24 of vaccination for 174 additional women, including for 4 women who self-reported as non-vaccinated in  
25  
26 the questionnaire. Furthermore, we found 23 additional doses by reviewing medical charts. We finally  
27  
28 identified proof of non-vaccination for 4 women who self-reported as vaccinated within the OGCT  
29  
30 model.  
31  
32

33  
34  
35 Therefore, 696/946 women (73.6%) received a Tdap vaccine during their pregnancy (Figure 1).  
36  
37

### 38 **Participants' characteristics**

39  
40 The median maternal age was 31 years. A large proportion of women were born in Canada (71.2%),  
41  
42 Francophone (79.8%), and married (89.0%). Approximately half had university level education (53.4%)  
43  
44 and were in their first pregnancy (43.5%). Participants significantly differed in socio-demographic  
45  
46 characteristics across models (Table 1), with the OGCT model having more non-Canadian born, non-  
47  
48 Francophones and with a higher education level. For the FMG model consisting of 3 recruitment sites,  
49  
50 characteristics are summarized in Table S1.  
51  
52

### 53 54 **Comparison of model-specific vaccine coverage**

1  
2  
3 To compare model performance, we evaluated model-specific VC considering only doses delivered  
4 within each model. For the baseline CLSC model, 96.3% of women who had received their Tdap did so  
5 within the CLSC vaccine delivery model (referral to the nearest CLSCs). The CLSC model-specific VC was  
6 63.8% (95%CI, 57.6%-69.6%) (Table 2 and Figure 2). In comparison, under the FMG model, 78.4% of  
7 vaccinated women were vaccinated in their corresponding FMG clinic, and the FMG model-specific VC  
8 was 67.8% (95%CI, 60.5%-74.4%), which did not significantly differ from baseline. The Obstetrics model  
9 showed a significantly lower model-specific VC at 35.3% (95%CI, 29.5%-41.5%), since only 41.1% of  
10 vaccinated women actually received their vaccine in that obstetrics clinic. Finally, the OGCT model-  
11 specific VC was 44.1% (95%CI, 38.5%-49.9%), which was significantly lower compared to baseline. 71.4%  
12 of vaccinated women received the Tdap vaccine during the OGCT.  
13  
14  
15  
16  
17  
18  
19  
20  
21  
22  
23  
24  
25

26 After adjusting for maternal age, country of birth (Canada vs. other), education, language and the  
27 number of prior children, compared to the CLSC model, the OR of receiving the Tdap vaccine within each  
28 vaccine delivery model was 1.26 (95%CI, 0.82-1.94) for the FMG model, 0.30 (95%CI, 0.20-0.44) for the  
29 Obstetrics model, and 0.46 (95%CI, 0.32-0.67) for the OGCT model.  
30  
31  
32  
33  
34  
35

36 VC was also calculated using aggregated data for all women who presented for their OGCT, regardless of  
37 recruitment status, which did not modify the overall VC associated with this model (Supplemental  
38 Appendix).  
39  
40  
41  
42  
43

#### 44 **Comparison of global vaccine coverage**

45  
46 To compare overall vaccine uptake, we evaluated global VC considering all doses administered  
47 regardless of vaccination place. For the baseline CLSC model, global Tdap VC was 66.3% (95%CI, 60.1%-  
48 71.9%). In comparison, a significantly higher VC was achieved by the FMG model (86.5%; 95%CI, 80.6%-  
49 90.9%) and the Obstetrics model (85.9%; 95%CI, 80.9%-89.7%). However, the OGCT model was not  
50  
51  
52  
53  
54  
55  
56  
57  
58  
59  
60



1  
2  
3 associated with a statistically significant difference in global VC compared to the baseline model (61.8%;  
4  
5 95% CI, 56.1%-67.2%).  
6  
7

8 Overall, maternal age above the median age of 31 years ( $p=0.008$ ) and nulliparity ( $p<0.001$ ) were  
9  
10 significantly associated with higher likelihood of vaccination. Being born in Canada ( $p=0.070$ ), having  
11  
12 completed a university level education ( $p=0.098$ ), and being a Francophone ( $p=0.071$ ) were positively  
13  
14 associated with Tdap vaccination without these associations being significant.  
15  
16

17  
18 The overall adjusted OR of receiving the Tdap vaccine was 4.05 for the FMG model (95% CI, 2.36-7.22),  
19  
20 3.37 for the Obstetrics model (95%CI, 2.11-5.49), and 0.92 for the OGCT model (95% CI, 0.62-1.37),  
21  
22 compared to the CLSC model.  
23  
24

## 25 26 **Interpretation**

27  
28 Referring patients to public health clinics (CLSC model) is the current standard model for maternal Tdap  
29  
30 vaccination in Quebec. Under this model, model-specific and global VC was moderately good but not  
31  
32 optimal (63.8% and 66.3%, respectively). The CLSC model was highly utilized by participants and thus  
33  
34 resulted in similar or higher model-specific VC compared to other delivery models. Nevertheless, the  
35  
36 FMG and Obstetrics model achieved significantly higher global VC (86.5% and 85.9%, respectively), a  
37  
38 difference of approximately 20 percentage points compared with the CLSC model.  
39  
40

41  
42 A previous study [21] reported that vaccination would be facilitated if offered in FMG clinics where  
43  
44 pregnancies are followed. In our study, model-specific VC was similar for the FMG model and the CLSC  
45  
46 model (~65%), but global VC increased to 85% for the FMG model when considering all vaccination  
47  
48 venues. Pregnant women were most likely to receive Tdap when it was recommended and offered by  
49  
50 their family physician, which could be explained by a stronger perceived importance of vaccination from  
51  
52 family physician/nurse offering prenatal care. High maternal Tdap VC was also observed in studies from  
53  
54 Belgium and the UK, where the main vaccinators were general practitioners [12,13]. In our context, high  
55  
56  
57  
58  
59  
60

1  
2  
3 VC of the FMG model suggested potential benefits of integrating vaccination in the prenatal care, as  
4 offered in FMG clinics.  
5  
6

7  
8 The obstetrics clinic offering Tdap vaccination during pregnancy follow-up also achieved significantly  
9 higher global VC (around 20 percentage points) compared to the CLSC model. A vaccine offer within the  
10 clinic may increase accessibility to Tdap vaccination and emphasize its importance. Maternal pertussis  
11 immunization recommendation from healthcare professionals traditionally involved in pregnancy,  
12 including obstetricians, has been associated with higher VC.[9,13] Interestingly, within our Obstetrics  
13 model, 41% of vaccinated women received their vaccine at the obstetrics clinic. It was likely that women  
14 decided to be vaccinated at their CLSC for reasons such as geographical accessibility, or limited  
15 appointment availability: the nurse offering Tdap vaccination only worked two days/week. Results could  
16 be different with another obstetric clinic organization.  
17  
18

19  
20 The impact of offering Tdap vaccination at the time of gestational diabetes screening had not been well  
21 studied. Our study showed that this strategy did not improve VC – model-specific or global. Suboptimal  
22 model-specific VC could be explained in part by the timing of the vaccine offer (before 26 weeks of  
23 gestation) or because the OGCT was perceived as an ordeal in itself. Diabetic and pre-diabetic women  
24 who were not present for an OGCT appointment were referred to CLSC, although the exclusion of these  
25 women did not improve the model-specific VC. Nevertheless, women utilized the OGCT model better  
26 than the obstetrics clinic, as a higher percentage (71.4%) of vaccinated women received their vaccine  
27 during their OGCT. This may highlight benefits of opportunistic vaccination services at the OGCT  
28 appointment, which overlaps with the ideal time for maternal pertussis immunization [21-23]. Future  
29 research is needed to evaluate strategies combining physician/obstetrician referral for OGCT and  
30 offering of Tdap during an OGCT appointment. Integration of Tdap vaccination with other prenatal  
31  
32  
33  
34  
35  
36  
37  
38  
39  
40  
41  
42  
43  
44  
45  
46  
47  
48  
49  
50  
51  
52  
53  
54  
55  
56  
57  
58  
59  
60

1  
2  
3 services should also be considered, which could refer women to other resources if they miss this  
4  
5 vaccination opportunity.  
6  
7

### 8 **Limitations**

9  
10  
11 In the present study, strengths include the quasi-experimental study design, which is effective at  
12  
13 evaluating vaccine delivery interventions [24], and the validation of vaccination history. Limitations  
14  
15 include the fact that participation rate was lower for the Obstetrics model. For one of the recruitment  
16  
17 site, participation rate was high (96%) and very high VC was also obtained. Medical charts were not  
18  
19 reviewed for the CLSC model, but after a sensitivity analysis (Supplementary Appendix; Table S2)  
20  
21 addressing this issue, conclusions remained similar to the primary analysis. Participants differed in socio-  
22  
23 demographic characteristics at baseline, which might have influenced their likelihood of Tdap  
24  
25 vaccination. We accounted for these differences in our multivariable models. Finally, our sample  
26  
27 recruited for the OGCT model may not be representative of the pregnant women population who access  
28  
29 prenatal care services in the province or the country, since the hospital where this model was  
30  
31 implemented serves a large urban multiethnic catchment area and is the referral center for high risk  
32  
33 pregnancies.  
34  
35  
36  
37  
38

### 39 **Conclusions**

40  
41  
42 This study identified that vaccination in FMG clinics providing prenatal care improved VC, despite it  
43  
44 being non-significantly higher than the current standard of practice at CLSCs – when only considering  
45  
46 vaccine doses administered within the FMG clinic (model-specific VC). Overall however, the addition of a  
47  
48 vaccine offer in FMG and obstetrics clinics was associated with significantly higher VC than the CLSC  
49  
50 model, while vaccination at an OGCT appointment did not have a significant impact on VC.  
51  
52  
53 Recommendation of vaccination from health professionals involved in routine pregnancy follow-up and  
54  
55 offering the vaccine may be the key factor in optimizing VC. This work and additional analyses on  
56  
57  
58  
59  
60

vaccine acceptability, as well as costs of vaccination strategies will be important to understand for the successful implementation of universal maternal pertussis vaccination in Quebec and elsewhere.

## References

- [1] Brophy J, Baclic O, Tunis MC on behalf of the National Advisory Committee on Immunization (NACI). Summary of the NACI Update on Immunization in Pregnancy with Tetanus Toxoid, Reduced Diphtheria Toxoid and Reduced Acellular Pertussis (Tdap) Vaccine. *Can Commun Dis Rep* [Internet]. 2018 Mar 1 [cited 2020 Aug 10]; 44(3/4): 91-4. Available from: <https://www.canada.ca/en/public-health/services/reports-publications/canada-communicable-disease-report-ccdr/monthly-issue/2018-44/issue-3-4-march-1-2018/article-5-update-immunization-pregnancy-vaccine-2018.html> doi: <https://doi.org/10.14745/ccdr.v44i34a04>
- [2] Abu-Raya B, Bettinger JA, Vanderkooi OG, Vaudry W, Halperin SA, Sadarangani M et al. (2020). Burden of Children Hospitalized With Pertussis in Canada in the Acellular Pertussis Vaccine Era, 1999–2015. *J Pediatric Infect Dis Soc* [Internet]. 2020 Jun [cited 2020 Aug 10]; 9(2): 118–27. Available from: <https://www.ncbi.nlm.nih.gov/pmc/articles/PMC7192396/> doi: [10.1093/jpids/piy128](https://doi.org/10.1093/jpids/piy128)
- [3] Public Health Agency of Canada. Pertussis vaccine: Canadian Immunization Guide [Internet]. Ottawa, Canada: Public Health Agency of Canada; 2018 [updated 2018 Apr 9; cited 2020 Aug 10]. Available from: <https://www.canada.ca/en/public-health/services/publications/healthy-living/canadian-immunization-guide-part-4-active-vaccines/page-15-pertussis-vaccine.html>
- [4] Fleurant-Ceelen A, Tunis M, House A, on behalf of the National Advisory Committee on Immunization (NACI). What is new in the Canadian Immunization Guide: November 2016 to November 2018. *Can Commun Dis Rep* [Internet]. 2018 Dec 6 [cited 2020 Aug 10]; 44(12): 331-5. Available from: <https://www.canada.ca/en/public-health/services/reports-publications/canada-communicable-disease-report-ccdr/monthly-issue/2018-44/issue-12-december-6-2018/article-6-updates-to-canadian-immunization-guide.html> doi: <https://doi.org/10.14745/ccdr.v44i12a06>
- [5] Abu Raya B, Edwards KM, Scheifele DW, Halperin SA. Pertussis and influenza immunisation during pregnancy: a landscape review. *Lancet Infect Dis* [Internet]. 2017 Jul 1 [cited 2020 Aug 10]; 17(7): e209–e222. Available from: [https://www.thelancet.com/journals/laninf/article/PIIS1473-3099\(17\)30190-1/fulltext](https://www.thelancet.com/journals/laninf/article/PIIS1473-3099(17)30190-1/fulltext) doi: [10.1016/S1473-3099\(17\)30190-1](https://doi.org/10.1016/S1473-3099(17)30190-1)
- [6] Gouvernement du Québec. Whooping cough. Quebec: Gouvernement du Québec; [updated 2019 Jun 20; cited 2020 Aug 18]. Available from: <https://www.quebec.ca/en/health/health-issues/a-z/whooping-cough/#c6954>
- [7] Koepke R, Kahn D, Petit AB, Schauer SL, Hopfensperger DJ, Conway JH, et al. Pertussis and influenza vaccination among insured pregnant women—Wisconsin, 2013–2014. *MMWR Morb Mortal Wkly Rep* [Internet]. 2015 Jul 17 [cited 2020 Aug 10]; 64(27): 746-50. Available from: <https://www.ncbi.nlm.nih.gov/pmc/articles/PMC4584586/>

- 1  
2  
3 [8] Barber A, Muscoplat MH, Fedorowicz A. Coverage with Tetanus, Diphtheria, and Acellular Pertussis  
4 Vaccine and Influenza Vaccine Among Pregnant Women - Minnesota, March 2013-December 2014.  
5 MMWR Morb Mortal Wkly Rep [Internet]. 2017 Jan 20 [cited 2020 Aug 10]; 66(2): 56–9. Available from:  
6 <https://www.ncbi.nlm.nih.gov/pmc/articles/PMC5657652/> doi: 10.15585/mmwr.mm6602a4  
7  
8  
9 [9] Kerr S, Van Bennekom CM, Liang JL, Mitchell AA. Tdap Vaccination Coverage During Pregnancy -  
10 Selected Sites, United States, 2006-2015. MMWR Morb Mortal Wkly Rep [Internet]. 2017 Oct 20 [cited  
11 2020 Aug 10]; 66(41): 1105–8. Available from:  
12 <https://www.ncbi.nlm.nih.gov/pmc/articles/PMC5689095/> doi: 10.15585/mmwr.mm6641a3  
13  
14  
15 [10] Ghaswalla P, Poirrier JE, Packnett ER, Irwin DE, Gray SR, Buck PO. Maternal Immunization in the  
16 U.S.: A Nationwide Retrospective Cohort Study. Am J of Prev Med [Internet]. 2019 Sep 1 [cited 2020 Aug  
17 10]; 57(3): e87–e93. Available from: [https://www.ajpmonline.org/article/S0749-3797\(19\)30207-](https://www.ajpmonline.org/article/S0749-3797(19)30207-7/fulltext)  
18 [7/fulltext](https://www.ajpmonline.org/article/S0749-3797(19)30207-7/fulltext) doi: 10.1016/j.amepre.2019.04.013  
19  
20  
21 [11] Razzaghi H, Kahn KE, Black CL, Lindley MC, Jatlaoui TC, Fiebelkorn AP, et al. Influenza and Tdap  
22 Vaccination Coverage Among Pregnant Women - United States, April 2020. MMWR Morb Mortal Wkly  
23 Rep [Internet]. 2020 Oct 2 [cited 2020 Oct 5]; 69(39):1391-7. Available from:  
24 <https://www.ncbi.nlm.nih.gov/pmc/articles/PMC7537555/> doi: 10.15585/mmwr.mm6939a2  
25  
26  
27 [12] Public Health England. Pertussis vaccination programme for pregnant women: vaccine coverage in  
28 England, January to March 2020 and 2019-20 annual coverage. Health Protection Report [Internet] 2020  
29 May 26 [cited 2020 Aug 10]; 14(10): 1-9. Available from:  
30 [https://assets.publishing.service.gov.uk/government/uploads/system/uploads/attachment\\_data/file/88](https://assets.publishing.service.gov.uk/government/uploads/system/uploads/attachment_data/file/887216/hpr1020_prtsss-vc.pdf)  
31 [7216/hpr1020\\_prtsss-vc.pdf](https://assets.publishing.service.gov.uk/government/uploads/system/uploads/attachment_data/file/887216/hpr1020_prtsss-vc.pdf)  
32  
33  
34 [13] Maertens K, Braeckman T, Top G, Van Damme P, Leuridan E. Maternal pertussis and influenza  
35 immunization coverage and attitude of health care workers towards these recommendations in  
36 Flanders, Belgium. Vaccine [Internet]. 2016 Nov 11 [cited 2020 Aug 10]; 34(47): 5785-91. Available from:  
37 <https://www.sciencedirect.com/science/article/pii/S0264410X16308829?via%3Dihub> doi:  
38 10.1016/j.vaccine.2016.09.055  
39  
40  
41 [14] Laenen J, Roelants M, Devlieger R, Vandermeulen C. Influenza and pertussis vaccination coverage in  
42 pregnant women. Vaccine [Internet]. 2015 Apr 27 [cited 2020 Aug 10]; 33(18): 2125-31. Available from:  
43 <https://www.sciencedirect.com/science/article/pii/S0264410X15003084?via%3Dihub> doi:  
44 10.1016/j.vaccine.2015.03.020  
45  
46  
47 [15] Griffin JB, Yu L, Watson D, Turner N, Walls T, Howe AS, et al. Pertussis Immunisation in Pregnancy  
48 Safety (PIPS) Study: A retrospective cohort study of safety outcomes in pregnant women vaccinated with  
49 Tdap vaccine. Vaccine [Internet]. 2018 Aug 16 [cited 2020 Aug 10]; 36(34): 5173–9. Available from:  
50 <https://www.sciencedirect.com/science/article/pii/S0264410X18309411?via%3Dihub> doi:  
51 10.1016/j.vaccine.2018.07.011  
52  
53  
54  
55  
56  
57  
58  
59  
60

- 1  
2  
3 [16] Deverall EJ, Gilmore B, Illing S, Peiris-John R. Pertussis vaccination uptake in pregnancy: lessons to  
4 be learned from an integrated healthcare approach. NZ Med J [Internet]. 2018 Apr 13 [cited 2020 Aug  
5 10]; 131(1473): 42-7. Available from: <https://www.nzma.org.nz/journal-articles/pertussis-vaccination-uptake-in-pregnancy-lessons-to-be-learned-from-an-integrated-healthcare-approach>  
6  
7  
8
- 9 [17] Erb ML, Erlanger TE, Heininger U. Child-parent immunization survey: How well are national  
10 immunization recommendations accepted by the target groups? Vaccine: X [internet]. 2019 Apr 11  
11 [cited 2020 Aug 10]; 1: 100013. Available from:  
12 <https://www.ncbi.nlm.nih.gov/pmc/articles/PMC6668236/> doi: [10.1016/j.jvacx.2019.100013](https://doi.org/10.1016/j.jvacx.2019.100013)  
13  
14
- 15 [18] Amirthalingam G, Andrews N, Campbell H, Ribeiro S, Kara E, Donegan K, et al. Effectiveness of  
16 maternal pertussis vaccination in England: an observational study. Lancet [Internet]. 2014 Oct 25 [cited  
17 2020 Aug 10]; 384(9953): 1521-8. Available from:  
18 [https://www.thelancet.com/journals/lancet/article/PIIS0140-6736\(14\)60686-3/fulltext](https://www.thelancet.com/journals/lancet/article/PIIS0140-6736(14)60686-3/fulltext) doi:  
19 [10.1016/S0140-6736\(14\)60686-3](https://doi.org/10.1016/S0140-6736(14)60686-3)  
20  
21
- 22 [19] Brillo E, Tosto V, Giardina I, Buonomo E. Maternal tetanus, diphtheria, and acellular pertussis (Tdap)  
23 and influenza immunization: an overview. J Matern Fetal Neonatal Med [Internet]. 2019 Oct 24 [cited  
24 2020 Aug 10]; 1-30. Available from:  
25 <https://www.tandfonline.com/doi/full/10.1080/14767058.2019.1680633> doi:  
26 [10.1080/14767058.2019.1680633](https://doi.org/10.1080/14767058.2019.1680633)  
27  
28
- 29 [20] Ahluwalia IB, Ding H, D'Angelo D, Shealy KH, Singleton JA, Liang J, et al. Tetanus, diphtheria,  
30 pertussis vaccination coverage before, during, and after pregnancy - 16 States and New York City, 2011.  
31 MMWR Morb Mortal Wkly Rep [Internet]. 2015 May 22 [cited 2020 Aug 18]; 64(19): 522-6. Available  
32 from: <https://www.ncbi.nlm.nih.gov/pmc/articles/PMC4584571/>  
33  
34
- 35 [21] Brousseau N, Gagnon D, Vivion M, Poliquin V, Boucoiran I, Tapiéro B, et al. Expected challenges of  
36 implementing universal pertussis vaccination during pregnancy in Quebec: a cross-sectional survey.  
37 CMAJ open [Internet]. 2018 Sep 20 [cited 2020 Aug 10]; 6(3): E391-7. Available from:  
38 <http://cmajopen.ca/content/6/3/E391.long> doi: [10.9778/cmajo.20180040](https://doi.org/10.9778/cmajo.20180040)  
39  
40
- 41 [22] National Advisory Committee on Immunization (NACI). Update on Immunization in Pregnancy with  
42 Tetanus Toxoid, Reduced Diphtheria Toxoid and Reduced Acellular Pertussis (Tdap) Vaccine [Internet].  
43 Ottawa, Canada: Public Health Agency of Canada; 2018 Feb [updated 2019 Oct 9; cited 2020 Aug 10].  
44 Available from: <https://www.canada.ca/en/public-health/services/publications/healthy-living/update-immunization-pregnancy-tdap-vaccine.html>  
45  
46  
47  
48
- 49 [23] Committee on Obstetric Practice & Immunization and Emerging Infections Expert Work Group.  
50 (2017). Committee Opinion No. 718: Update on Immunization and Pregnancy: Tetanus, Diphtheria, and  
51 Pertussis Vaccination. Obstet Gynecol [Internet]. 2017 [cited 2020 Aug 18]; 130(3): e153-7. Available  
52 from: <https://www.acog.org/clinical/clinical-guidance/committee-opinion/articles/2017/09/update-on-immunization-and-pregnancy-tetanus-diphtheria-and-pertussis-vaccination>  
53  
54  
55  
56  
57  
58  
59  
60

[24] Lopez Bernal JA, Andrews N, Amirthalingam G. The use of quasi-experimental designs for vaccine evaluation. Clin Infect Dis [Internet]. 2019 May 2 [cited 2020 Aug 10]; 68(10): 1769-76. Available from: <https://academic.oup.com/cid/article/68/10/1769/5140188> doi: 10.1093/cid/ciy906

Confidential

Table 1. Baseline socio-demographic characteristics from the recruitment questionnaire

| Characteristic                                   | No. (%)*                |                        |                               |                         |                   | <i>p</i> ‡ |
|--------------------------------------------------|-------------------------|------------------------|-------------------------------|-------------------------|-------------------|------------|
|                                                  | Vaccine delivery models |                        |                               |                         |                   |            |
|                                                  | CLSC<br>n = 246 (26.0%) | FMG<br>n = 171 (18.1%) | Obstetrics<br>n = 241 (25.5%) | OGCT<br>n = 288 (30.4%) | Total<br>N = 946† |            |
| <b>Median maternal age, year (IQR)</b>           | 30 (6)                  | 30 (6)                 | 30 (7)                        | 32 (7)                  | 31 (7)            | < 0.001    |
| <b>Born in Canada</b>                            |                         |                        |                               |                         |                   |            |
| Yes                                              | 191 (77.6%)             | 129 (75.4%)            | 211 (87.5%)                   | 143 (49.6%)             | 674 (71.2%)       |            |
| No                                               | 47 (19.1%)              | 34 (19.9%)             | 19 (7.9%)                     | 141 (49.0%)             | 241 (25.5%)       | < 0.001    |
| No response                                      | 8 (3.3%)                | 8 (4.7%)               | 11 (4.6%)                     | 4 (1.4%)                | 31 (3.3%)         |            |
| <b>Marital Status</b>                            |                         |                        |                               |                         |                   |            |
| Married                                          | 221 (89.8%)             | 158 (92.4%)            | 197 (81.7%)                   | 266 (92.4%)             | 842 (89.0%)       |            |
| Other                                            | 23 (9.4%)               | 11 (6.4%)              | 38 (15.8%)                    | 20 (6.9%)               | 92 (9.7%)         | 0.003      |
| No response (Prefer not to answer & no response) | 2 (0.8%)                | 2 (1.2%)               | 6 (2.5%)                      | 2 (0.7%)                | 12 (1.3%)         |            |
| <b>Level of education</b>                        |                         |                        |                               |                         |                   |            |
| University                                       | 126 (51.2%)             | 88 (51.5%)             | 93 (38.6%)                    | 198 (68.7%)             | 505 (53.4%)       |            |
| Other (College or less)                          | 119 (48.4%)             | 82 (47.9%)             | 148 (61.4%)                   | 88 (30.6%)              | 437 (46.2%)       | < 0.001    |
| No response (Prefer not to answer & no response) | 1 (0.4%)                | 1 (0.6%)               | 0 (0%)                        | 2 (0.7%)                | 4 (0.4%)          |            |
| <b>Language</b>                                  |                         |                        |                               |                         |                   |            |
| French                                           | 190 (77.2%)             | 150 (87.7%)            | 226 (93.8%)                   | 189 (65.6%)             | 755 (79.8%)       |            |
| Other                                            | 56 (22.8%)              | 21 (12.3%)             | 15 (6.2%)                     | 99 (34.4%)              | 191 (20.2%)       | < 0.001    |
| <b>Number of previous children</b>               |                         |                        |                               |                         |                   |            |
| First Pregnancy                                  | 133 (54.1%)             | 66 (38.6%)             | 93 (38.6%)                    | 119 (41.3%)             | 411 (43.5%)       | 0.005      |



|                                                            |             |             |             |             |             |         |
|------------------------------------------------------------|-------------|-------------|-------------|-------------|-------------|---------|
| 1 child or more prior to this pregnancy                    | 113 (45.9%) | 105 (61.4%) | 147 (61.0%) | 168 (58.3%) | 533 (56.3%) |         |
| No response                                                | 0 (0%)      | 0 (0%)      | 1 (0.4%)    | 1 (0.4%)    | 2 (0.2%)    |         |
| <b>Diabetes</b>                                            |             |             |             |             |             |         |
| Yes                                                        | 9 (3.7%)    | 7 (4.1%)    | 6 (2.5%)    | 21 (7.3%)   | 43 (4.5%)   |         |
| No                                                         | 234 (95.1%) | 162 (94.7%) | 232 (96.3%) | 264 (91.7%) | 892 (94.3%) | 0.242   |
| Unknown (Do not know + no response)                        | 3 (1.2%)    | 2 (1.2%)    | 3 (1.2%)    | 3 (1.0%)    | 11 (1.2%)   |         |
| <b>Type of health professional following the pregnancy</b> |             |             |             |             |             |         |
| Family physician                                           | 136 (55.3%) | 114 (66.7%) | 3 (1.2%)    | 7 (2.4%)    | 260 (27.5%) |         |
| Obstetrician                                               | 95 (38.6%)  | 25 (14.6%)  | 232 (96.3%) | 267 (92.7%) | 619 (65.4%) |         |
| Other (including multiple health professionals)            | 11 (4.5%)   | 26 (15.2%)  | 5 (2.1%)    | 14 (4.9%)   | 56 (5.9%)   | < 0.001 |
| No response                                                | 4 (1.6%)    | 6 (3.5%)    | 1 (0.4%)    | 0 (0%)      | 11 (1.2%)   |         |

Note: CLSC = local community service centre, FMG = family medicine group, OGCT = oral glucose challenge test, IQR = interquartile range.

\*Unless otherwise specified.

†946 women were eligible after exclusion of 54 women who did not meet the inclusion criteria.

‡Comparison of participants' characteristics across the four vaccine delivery models using Kruskal-Wallis test, Pearson's Chi Squared test or by Monte Carlo simulation for cells with expected count <5.

1  
2  
3  
4  
5  
6  
7  
8  
9  
10  
11  
12  
13  
14  
15  
16  
17  
18  
19  
20  
21  
22  
23  
24  
25  
26  
27  
28  
29  
30  
31  
32  
33  
34  
35  
36  
37  
38  
39  
40  
41  
42  
43  
44  
45  
46  
47

Table 2. Tdap vaccine coverage, model-specific and global.

| Vaccine delivery models | Vaccinated within model | Vaccinated outside model | Proportion vaccinated within model | Model-specific                 |                   |                   | Global                         |                        |                   |                   |
|-------------------------|-------------------------|--------------------------|------------------------------------|--------------------------------|-------------------|-------------------|--------------------------------|------------------------|-------------------|-------------------|
|                         |                         |                          |                                    | Model-specific VC [95% CI]     | OR* [95% CI]      | aOR† [95% CI]     | Global VC [95% CI]             | Absolute VC difference | OR* [95% CI]      | aOR† [95% CI]     |
| CLSC (n = 246)          | 157                     | 6                        | 157/163 (96.3%)                    | 157/246 (63.8%) [57.6%, 69.6%] | 1 (Reference)     | 1 (Reference)     | 163/246 (66.3%) [60.1%, 71.9%] | Reference              | 1 (Reference)     | 1 (Reference)     |
| FMG (n = 171)           | 116                     | 32                       | 116/148 (78.4%)                    | 116/171 (67.8%) [60.5%, 74.4%] | 1.20 [0.79, 1.81] | 1.26 [0.82, 1.94] | 148/171 (86.5%) [80.6%, 90.9%] | 20.2%                  | 3.28 [1.99, 5.57] | 4.05 [2.36, 7.22] |
| Obstetrics (n = 241)    | 85                      | 122                      | 85/207 (41.1%)                     | 85/241 (35.3%) [29.5%, 41.5%]  | 0.31 [0.21, 0.45] | 0.30 [0.20, 0.44] | 207/241 (85.9%) [80.9%, 89.7%] | 19.6%                  | 3.10 [1.99, 4.91] | 3.37 [2.11, 5.49] |
| OGCT (n = 288)          | 127                     | 51                       | 127/178 (71.4%)                    | 127/288 (44.1%) [38.5%, 49.9%] | 0.45 [0.31, 0.63] | 0.47 [0.32, 0.68] | 178/288 (61.8%) [56.1%, 67.2%] | 4.5%                   | 0.82 [0.58, 1.17] | 0.92 [0.62, 1.37] |

Note: CLSC = local community service centre, FMG = family medicine group, OGCT = oral glucose challenge test, VC = vaccine coverage, OR = odds ratio, aOR = adjusted odds ratio.  
 \*Odds ratios calculated from univariate logistic regression.  
 †Adjusted odds ratios calculated from multivariable logistic regression, adjusting for maternal age, country of birth (Canada vs. other), education, language and the number of prior children.

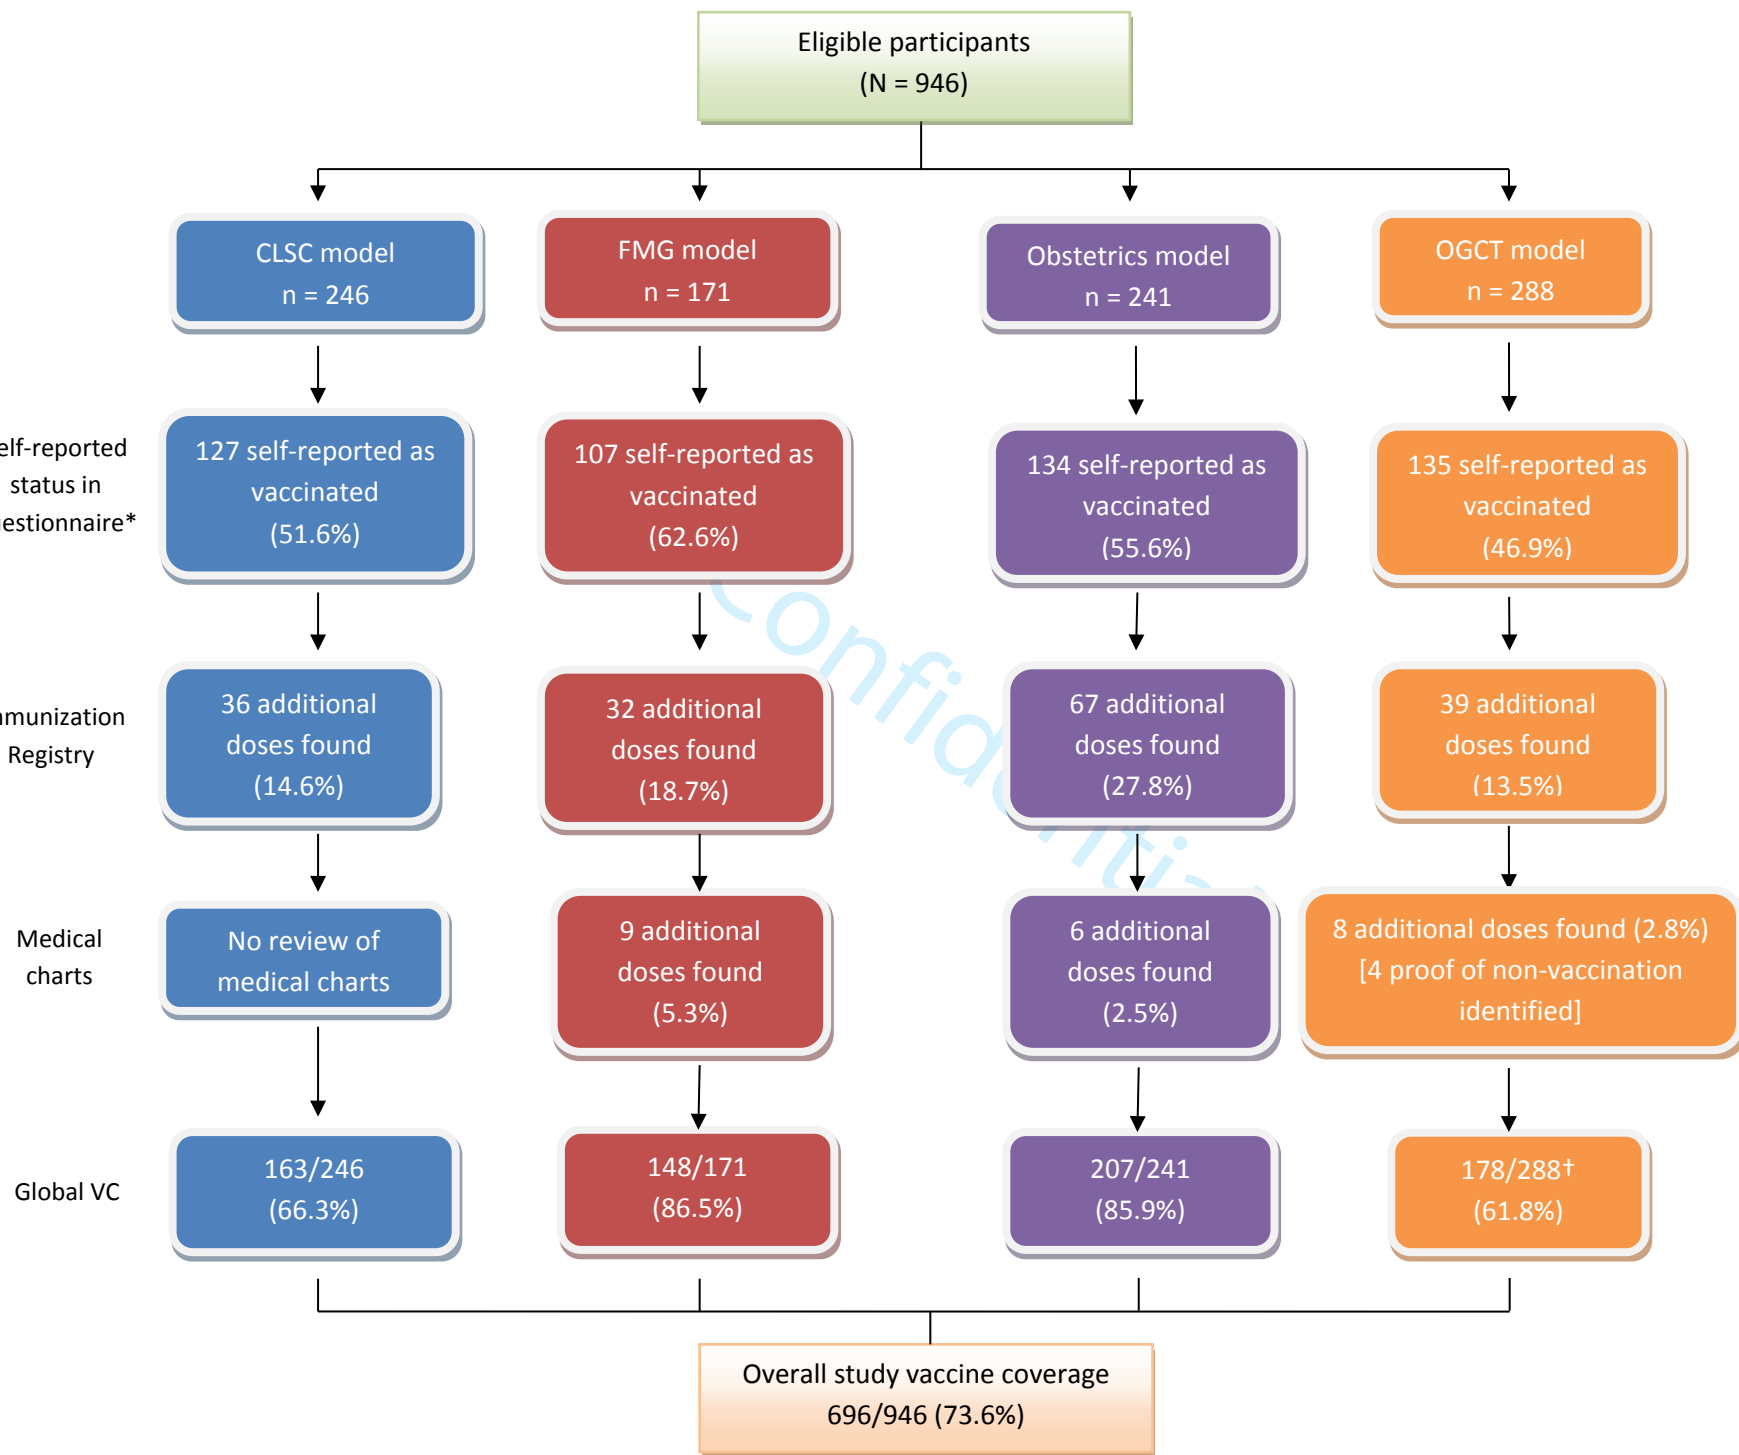

Figure 1. Summary of the process for determining vaccination status using the self-report questionnaire response, the Quebec Immunization Registry and medical charts.

Note: CLSC = local community service centre, FMG = family medicine group, OGCT = oral glucose challenge test.

\*Questionnaire response rate: CLSC model: 159/246 (64.6%); FMG model: 122/171 (71.3%); Obstetrics model: 142/241 (58.9%); OGCT model: 196/288 (68.1%).

† For the OGCT model, the global vaccine coverage was adjusted to 178/288 after identifying a proof of non-vaccination for 4 women who self-reported as vaccinated.

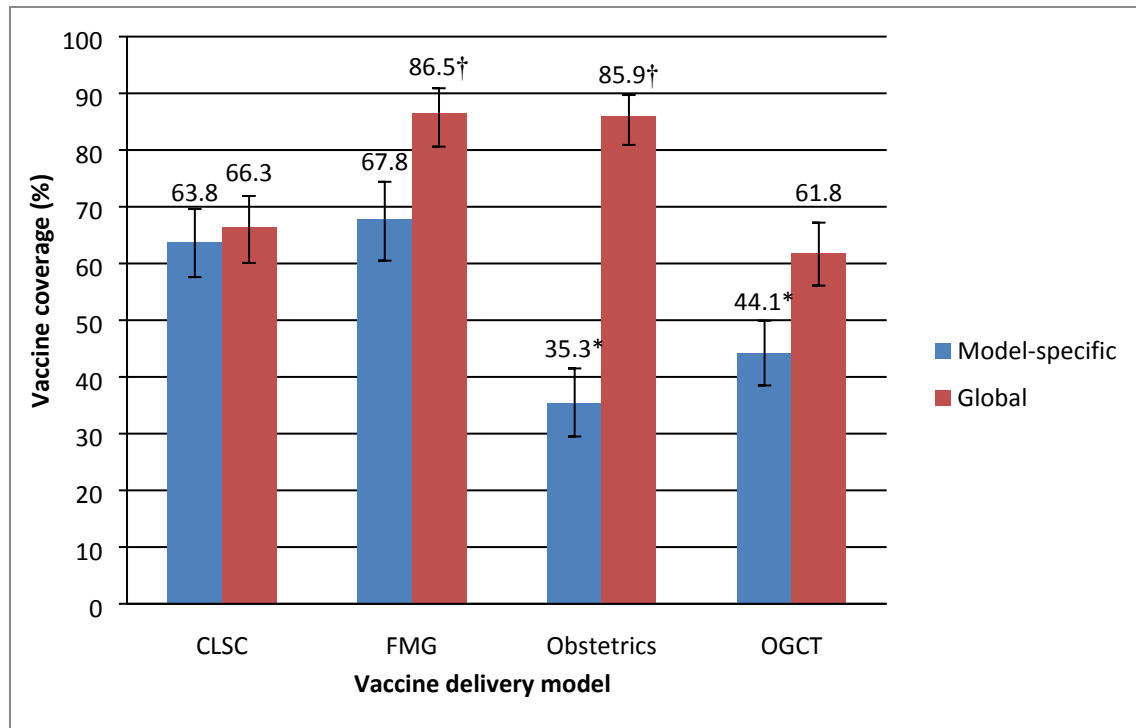

Figure 2. Model-specific and global vaccine coverage of the four vaccine delivery models.

\*The model-specific vaccine coverage of the Obstetrics and OGCT model were significantly lower compared to model-specific vaccine coverage of the baseline CLSC model ( $p < 0.001$ ).

†The global vaccine coverage of the FMG and Obstetrics model were significantly higher compared to the global vaccine coverage of the baseline CLSC model ( $p < 0.001$ ).

## Supplementary Appendix

### Table of Contents

|                                             |   |
|---------------------------------------------|---|
| Supplementary Methods .....                 | 2 |
| Vaccination at OGCT (aggregated data) ..... | 2 |
| Sensitivity Analyses .....                  | 2 |
| Supplementary Results .....                 | 3 |
| Vaccination at OGCT (aggregated data).....  | 3 |
| Sensitivity Analyses.....                   | 3 |
| Supplementary Tables .....                  | 4 |
| Table S1.....                               | 4 |
| Table S2.....                               | 6 |
| Table S3.....                               | 7 |

Confidential

## Supplementary Methods

### Vaccination during the oral glucose challenge test (aggregated data)

For the oral glucose challenge test (OGCT) model, VC was calculated using aggregated data collected daily at the blood procurement centre for all women, regardless of their recruitment in the study.

Results were compared to the baseline VC of the primary analysis.

### Sensitivity Analyses

Sensitivity analyses were performed to test the robustness of the results. Since no medical charts were reviewed for the CLSC model, an analysis was performed assuming as vaccinated women who indicated unknown vaccination status or who did not answer the self-reported questionnaire and for whom information in the Immunization Registry was unavailable. This led to a higher VC for the CLSC model which was again compared with VC of other models. A second sensitivity analysis was performed for the OGCT model where we excluded pregnant women who were known diabetes by their medical charts.

## Supplementary Results

### Vaccination during OGCT

The aggregated data showed that, among recruited women who attended the OGCT in the participating site, 99/210 (47.1%; 95%CI, 40.5%-53.9%) were vaccinated during or after the OGCT waiting hour. Tdap VC was significantly lower than the baseline model-specific VC (63.8%;  $p < 0.001$ ). Regardless of recruitment status, 290/802 (36.2%; 95%CI, 32.9%-39.5%) of women who came to their OGCT received the Tdap vaccine during their appointment.

### Sensitivity analyses

For the CLSC model where medical charts were not reviewed, we found 17 women who indicated unknown vaccination status or who did not answer the self-reported questionnaire, for whom there was no information available in the Immunization Registry. Assuming that these 17 women would have been vaccinated in a CLSC, the analysis showed that the model-specific VC of the FMG model remained similar to the CLSC model ( $p = 0.528$ ), and the FMG model ( $p = 0.001$ ) and the obstetrics model ( $p < 0.001$ ) still achieved significantly higher global VC than the CLSC model (Table S2).

A second analysis was performed for the OGCT model specifically after the exclusion of 19 diabetic and pre-diabetic women who were not present at the OGCT during which the Tdap vaccine was offered (Table S3). Comparisons of the model-specific and global VC to the baseline again aligned with our primary analysis results.

## Supplementary Tables

Table S1. Baseline socio-demographic characteristics from the recruitment questionnaire (Family medicine group model).

| Characteristics                                  | No. (%)*                |                         |                         | p†     |
|--------------------------------------------------|-------------------------|-------------------------|-------------------------|--------|
|                                                  | Recruitment site        |                         |                         |        |
|                                                  | FMG 1<br>n = 48 (28.1%) | FMG 2<br>n = 42 (24.6%) | FMG 3<br>n = 81 (47.4%) |        |
| <b>Median maternal age (IQR)</b>                 | 31 (8)                  | 29 (5)                  | 30 (5)                  | 0.125  |
| <b>If born in Canada (%)</b>                     |                         |                         |                         |        |
| Yes                                              | 24 (50.0%)              | 34 (81.0%)              | 71 (87.7%)              | <0.001 |
| No                                               | 22 (45.8%)              | 8 (19.0%)               | 4 (4.9%)                |        |
| No response                                      | 2 (4.2%)                | 0 (0%)                  | 6 (7.4%)                |        |
| <b>Marital Status (%)</b>                        |                         |                         |                         |        |
| Married                                          | 45 (93.8%)              | 38 (90.5%)              | 75 (92.6%)              | 0.979  |
| Other                                            | 3 (6.2%)                | 3 (7.1%)                | 5 (6.2%)                |        |
| No response (Prefer not to answer + no response) | 0 (0%)                  | 1 (2.4%)                | 1 (1.2%)                |        |
| <b>Level of education (%)</b>                    |                         |                         |                         |        |
| University                                       | 29 (60.4%)              | 23 (54.8%)              | 36 (44.4%)              | 0.111  |
| Other (College or less)                          | 19 (39.6%)              | 18 (42.9%)              | 45 (55.6%)              |        |
| No response (Prefer not to answer + no response) | 0 (0%)                  | 1 (2.4%)                | 0 (0%)                  |        |
| <b>Language (%)</b>                              |                         |                         |                         |        |
| French                                           | 35 (72.9%)              | 38 (90.5%)              | 77 (95.1%)              | <0.001 |
| Other                                            | 13 (27.1%)              | 4 (9.5%)                | 4 (4.9%)                |        |
| <b>Number of infants (%)</b>                     |                         |                         |                         |        |
| First Pregnancy                                  | 14 (29.2%)              | 19 (45.2%)              | 33 (40.7%)              | 0.254  |
| 1 child or more prior to this pregnancy          | 34 (70.8%)              | 23 (54.8%)              | 48 (59.3%)              |        |
| <b>Diabetes (%)</b>                              |                         |                         |                         |        |



|                                                                |            |            |            |       |
|----------------------------------------------------------------|------------|------------|------------|-------|
| Yes                                                            | 1 (2.1%)   | 1 (2.4%)   | 5 (6.2%)   |       |
| No                                                             | 47 (97.9%) | 39 (92.9%) | 76 (93.8%) | 0.087 |
| Unknown (Do not know + no response)                            | 0 (0%)     | 2 (4.8%)   | 0 (0%)     |       |
| <b>Type of health professional following the pregnancy (%)</b> |            |            |            |       |
| Family physician                                               | 30 (62.5%) | 25 (59.5%) | 59 (72.8%) |       |
| Obstetrician                                                   | 10 (20.8%) | 5 (11.9%)  | 10 (12.4%) | 0.099 |
| Other (including multiple health professionals)                | 6 (12.5%)  | 8 (19.0%)  | 12 (14.8%) |       |
| No response                                                    | 2 (4.2%)   | 4 (9.5%)   | 0 (0%)     |       |

Note: FMG = family medicine group, IQR = interquartile range.

\*Unless otherwise specified.

† P-values calculated from Kruskal-Wallis test and Pearson's Chi Squared test. For cells with expected count <5, p-values are computed by Monte Carlo simulation.

Confidential

1  
2  
3  
4  
5  
6  
7  
8  
9  
10  
11  
12  
13  
14  
15  
16  
17  
18  
19  
20  
21  
22  
23  
24  
25  
26  
27  
28  
29  
30  
31  
32  
33  
34  
35  
36  
37  
38  
39  
40  
41  
42  
43  
44  
45  
46  
47

Table S2. Sensitivity analyses of the Tdap vaccine coverage, considering higher vaccine coverage for the CLSC model\*

| Vaccine delivery models | Model-specific                 |                          |                           | Global                         |                          |                           |
|-------------------------|--------------------------------|--------------------------|---------------------------|--------------------------------|--------------------------|---------------------------|
|                         | Model-specific VC [95% CI]     | OR <sup>†</sup> [95% CI] | aOR <sup>‡</sup> [95% CI] | Global VC [95% CI]             | OR <sup>†</sup> [95% CI] | aOR <sup>‡</sup> [95% CI] |
| CLSC (n = 246)          | 174/246 (70.7%) [64.8%, 76.1%] | 1 (Reference)            | 1 (Reference)             | 180/246 (73.2%) [67.3%, 78.3%] | 1 (Reference)            | 1 (Reference)             |
| FMG (n = 171)           | 116/171 (67.8%) [60.5%, 74.4%] | 0.87 [0.57, 1.33]        | 0.95 [0.61, 1.48]         | 148/171 (86.5%) [80.6%, 90.9%] | 2.36 [1.42, 4.04]        | 2.98 [1.72, 5.34]         |
| Obstetrics (n = 241)    | 85/241 (35.3%) [29.5%, 41.5%]  | 0.23 [0.15, 0.33]        | 0.23 [0.15, 0.34]         | 207/241 (85.9%) [80.9%, 89.7%] | 2.23 [1.42, 3.57]        | 2.57 [1.59, 4.21]         |
| OGCT (n = 288)          | 127/288 (44.1%) [38.5%, 49.9%] | 0.33 [0.23, 0.47]        | 0.33 [0.22, 0.48]         | 178/288 (61.8%) [56.1%, 67.2%] | 0.59 [0.41, 0.86]        | 0.63 [0.42, 0.94]         |

Note: CLSC = local community service centre, FMG = family medicine group, OGCT = oral glucose challenge test, VC = vaccine coverage, OR = odds ratio, aOR = adjusted odds ratio.

\*The sensitivity analyses assumed that 17 additional participants would have been vaccinated in the CLSC model.

<sup>†</sup>Odds ratios calculated from univariate logistic regression.

<sup>‡</sup>Adjusted odds ratios calculated from multivariable logistic regression, adjusting for maternal age, country of birth (Canada vs. other), education, language and the number of prior children

Table S3. Sensitivity analyses of the Tdap vaccine coverage, excluding some women from the Oral Glucose Challenge Test model\*

| Vaccine delivery models | Model-specific                 |                          |                           | Global                         |                          |                           |
|-------------------------|--------------------------------|--------------------------|---------------------------|--------------------------------|--------------------------|---------------------------|
|                         | Model-specific VC [95% CI]     | OR <sup>†</sup> [95% CI] | aOR <sup>‡</sup> [95% CI] | Global VC [95% CI]             | OR <sup>†</sup> [95% CI] | aOR <sup>‡</sup> [95% CI] |
| CLSC (n = 246)          | 157/246 (63.8%) [57.6%, 69.6%] | 1 (Reference)            | 1 (Reference)             | 163/246 (66.3%) [60.1%, 71.9%] | 1 (Reference)            | 1 (Reference)             |
| OGCT (n = 269)          | 127/269 (47.2%) [41.3%, 53.2%] | 0.51 [0.36, 0.72]        | 0.50 [0.34, 0.73]         | 174/269 (64.7%) [58.8%, 70.2%] | 0.93 [0.65, 1.34]        | 0.99 [0.66, 1.48]         |

Note: CLSC = local community service centre, OGCT = oral glucose challenge test, VC = vaccine coverage, OR = odds ratio, aOR = adjusted odds ratio.

\*The sensitivity analysis was done after the exclusion of 19 women diagnosed with gestational diabetics or pre-gestational diabetics.

Comparisons of VC, ORs, and aORs were against the baseline CLSC model of the primary analysis.

<sup>†</sup>OR = Odds ratios calculated from univariate logistic regression.

<sup>‡</sup>aOR = Adjusted odds ratios calculated from multivariable logistic regression, adjusting for maternal age, country of birth (Canada vs. other), education, language and the number of prior children.
